# Supplementary material for: DNA demethylating agents suppress preclinical models of synovial sarcoma
Source: JCI journal article supplement (doi:10.1172/jci190855), 2025-04-29

Full unedited gel for Figure 2A

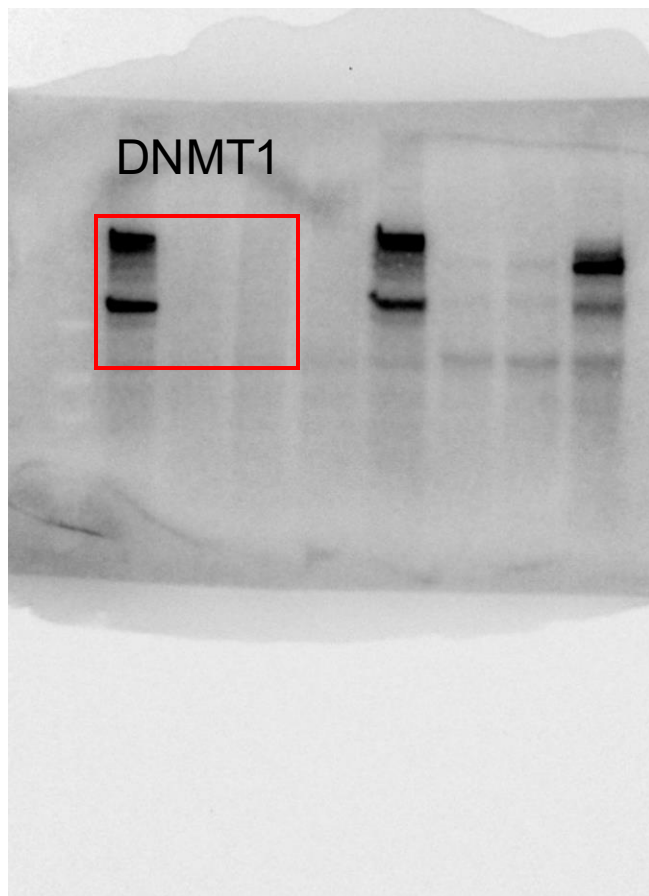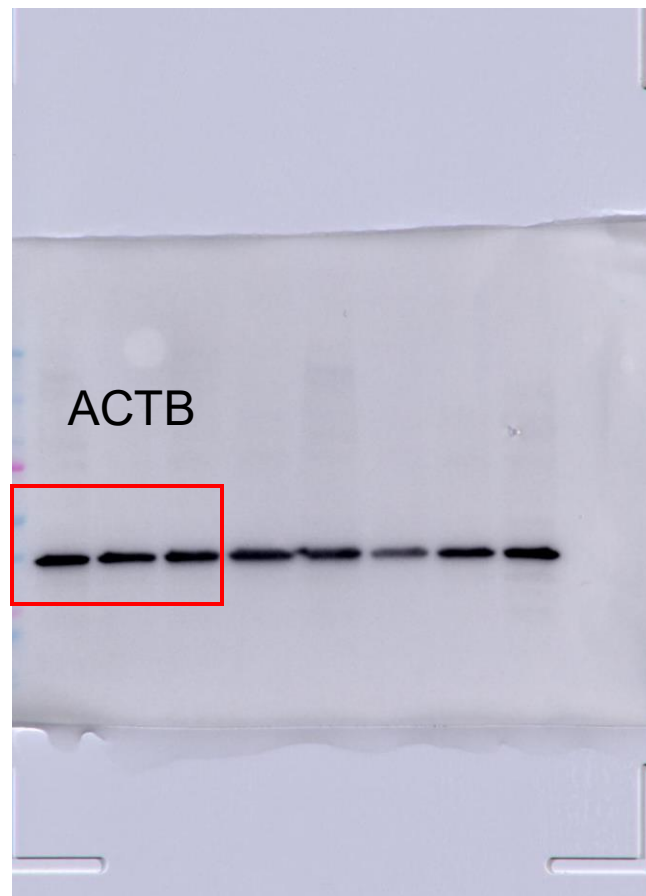

Supplement: sd2 [file 2]
